# Supplementary material for: Cross-National Associations between Age at Marriage and Intimate Partner Violence among Young Women: An Analysis of Demographic and Health Surveys from 48 Countries
Source: MDPI journal article supplement (doi:10.3390/ijerph20043218), 2023-02-12
Supplement: s1 [file s1]

## Supplementary Materials

### Pooled multilevel logistic regression models – women aged 20 to 24 years

We used fractional polynomials with two powers to determine the best parametrization for the age at the first marriage in the pooled multilevel logistic regression models. The two powers with the best fit selected by the fp command in Stata are presented in Supplementary Table 1. The default powers tested by Stata are -2, -1, -0.5, 0, 0.5, 1, 2, and 3. Further information about the fp command is available in <https://www.stata.com/manuals13/rfp.pdf>. For all models, 55,886 women had information available for all variables. The average number of women in each country was 1,164, ranging from 161 to 8,694. Supplementary Table 2 shows the regression coefficients for each power.

**Supplementary Table S1.** Selected powers for the pooled multilevel logistic regression models for women aged 20 to 24 years. Each model corresponds to one type of IPV.

| IPV type      | First power                           | Second power                                                                   |
|---------------|---------------------------------------|--------------------------------------------------------------------------------|
| Physical      | $(\text{age at first marriage})^2$    | $(\text{age at first marriage})^3$                                             |
| Sexual        | $(\text{age at first marriage})^{-1}$ | $(\text{age at first marriage})^{-1} \times \ln(\text{age at first marriage})$ |
| Psychological | $(\text{age at first marriage})^3$    | $(\text{age at first marriage})^3 \times \ln(\text{age at first marriage})$    |

**Supplementary Table S2.** Regression coefficients for the selected powers of the pooled multilevel logistic regression models for women aged 20 to 24 years. Each model corresponds to one type of IPV.

| IPV type      | Coefficient of the first power (95% CI) | Coefficient of the second power (95% CI) |
|---------------|-----------------------------------------|------------------------------------------|
| Physical      | 0.008 (-0.002; 0.019)                   | -0.000 (-0.001; -0.000)                  |
| Sexual        | -151.7 (-261.1; -42.4)                  | 96.2 (34.7; 157.8)                       |
| Psychological | 0.001 (-0.000; 0.001)                   | -0.000 (-0.000; 0.000)                   |

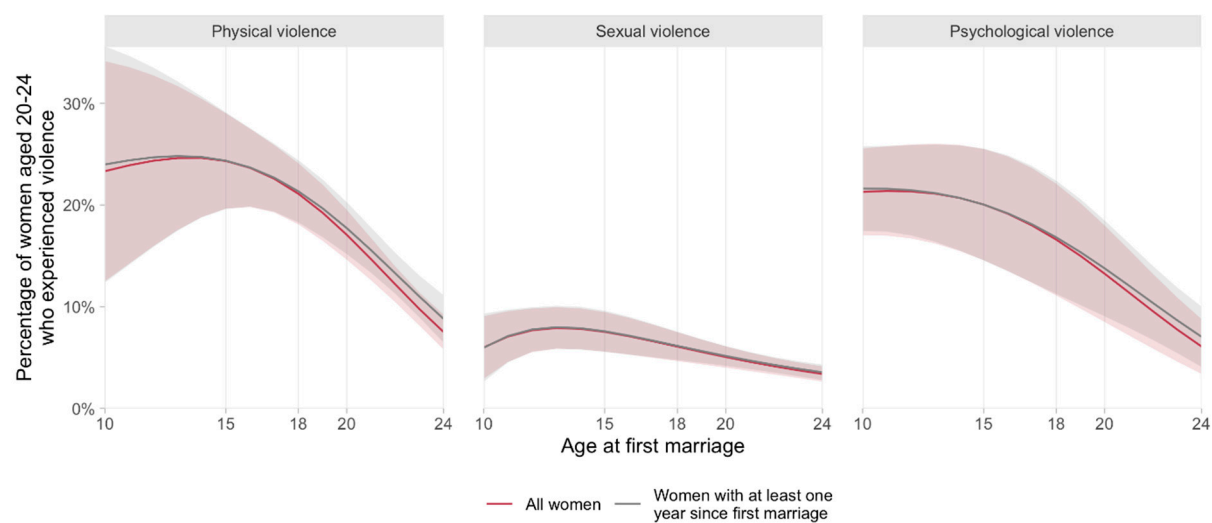

**Supplementary Figure S1.** Sensitivity analysis comparing the results for all women with women who had been married for at least one year.

**Supplementary Table S3.** Country specific differences on the prevalence of IPV.

| Country                   | Physical IPV |             |             |                          | Sexual IPV |             |             |                          | Psychological IPV |             |             |                          |
|---------------------------|--------------|-------------|-------------|--------------------------|------------|-------------|-------------|--------------------------|-------------------|-------------|-------------|--------------------------|
|                           | Difference   | 95%CI       |             | N women who reported IPV | Difference | 95%CI       |             | N women who reported IPV | Difference        | 95%CI       |             | N women who reported IPV |
|                           |              | Lower limit | Upper limit |                          |            | Lower limit | Upper limit |                          |                   | Lower limit | Upper limit |                          |
| Afghanistan               | 27.9         | 16.3        | 39.5        | 1446                     | 4.7        | 1.6         | 7.8         | 254                      | 23.6              | 14.4        | 32.8        | 1024                     |
| Angola                    | 9.5          | -7.0        | 25.9        | 432                      | 3.2        | -12.2       | 18.5        | 143                      | 8.9               | -6.9        | 24.8        | 352                      |
| Armenia                   | 16.1         | -25.0       | 57.3        | 7                        | 0.0        | 0.0         | 0.0         | ----                     | 15.4              | -12.4       | 43.2        | 18                       |
| Benin                     | 9.9          | 3.7         | 16.1        | 60                       | -0.5       | -8.5        | 7.5         | 42                       | 13.1              | -5.5        | 31.8        | 179                      |
| Burkina_Faso              | 11.5         | 7.3         | 15.7        | 197                      | 2.3        | 0.9         | 3.7         | 35                       | 7.6               | 3.8         | 11.4        | 154                      |
| Burundi                   | 12.3         | -0.8        | 25.3        | 267                      | 3.6        | -9.9        | 17.0        | 253                      | 6.3               | -7.7        | 20.3        | 220                      |
| Cambodia                  | 9.1          | 2.7         | 15.5        | 38                       | 8.3        | -0.2        | 16.7        | 15                       | 14.2              | 5.7         | 22.7        | 61                       |
| Cameroon                  | -2.5         | -19.9       | 15.0        | 145                      | 0.7        | -10.6       | 11.9        | 54                       | 9.6               | -5.1        | 24.2        | 137                      |
| Chad                      | -13.1        | -34.0       | 7.8         | 99                       | 2.3        | -13.2       | 17.9        | 50                       | -12.8             | -35.9       | 10.3        | 106                      |
| Colombia                  | 17.0         | 7.2         | 26.8        | 1095                     | 6.0        | 2.9         | 9.1         | 149                      | 24.5              | 15.9        | 33.2        | 973                      |
| Comoros                   | -5.8         | -42.8       | 31.1        | 29                       | -24.8      | -74.7       | 25.0        | 8                        | 3.6               | -3.1        | 10.2        | 32                       |
| Congo_Democratic_Republic | 22.9         | 6.5         | 39.2        | 410                      | 3.4        | -27.3       | 34.2        | 234                      | 23.3              | 8.2         | 38.5        | 362                      |
| Cote_d'Ivoire             | 1.0          | -13.4       | 15.5        | 212                      | 4.5        | -2.5        | 11.5        | 49                       | -7.4              | -21.3       | 6.5         | 122                      |
| Dominican_Republic        | 12.8         | 3.1         | 22.5        | 142                      | 1.9        | -3.7        | 7.4         | 42                       | 21.8              | 7.2         | 36.5        | 253                      |
| Egypt                     | 10.1         | -1.3        | 21.6        | 164                      | -0.4       | -5.9        | 5.0         | 31                       | 12.8              | 4.0         | 21.5        | 122                      |
| Ethiopia                  | 4.2          | -15.6       | 23.9        | 130                      | 5.4        | -6.0        | 16.9        | 41                       | -15.1             | -63.7       | 33.5        | 145                      |
| Gabon                     | 14.7         | -7.5        | 36.8        | 239                      | 7.3        | -5.2        | 19.8        | 72                       | 30.4              | 16.6        | 44.3        | 180                      |
| Gambia                    | 6.7          | 2.4         | 11.0        | 60                       | 0.0        | -1.1        | 1.0         | 11                       | 5.0               | -0.7        | 10.7        | 71                       |
| Guatemala                 | 4.2          | -6.5        | 15.0        | 101                      | 2.9        | -2.1        | 7.9         | 25                       | 14.2              | 1.3         | 27.1        | 174                      |
| Haiti                     | 17.2         | 5.4         | 29.0        | 68                       | -4.9       | -18.4       | 8.6         | 43                       | 0.6               | -20.4       | 21.6        | 100                      |
| Honduras                  | 9.2          | 2.4         | 16.1        | 258                      | 2.1        | -1.2        | 5.3         | 62                       | 23.9              | 17.1        | 30.8        | 469                      |
| India                     | 18.0         | 13.1        | 22.8        | 1923                     | 2.2        | 0.0         | 4.3         | 456                      | 10.0              | 6.8         | 13.3        | 846                      |

|                  |             |             |             |              |            |            |            |             |             |            |             |              |
|------------------|-------------|-------------|-------------|--------------|------------|------------|------------|-------------|-------------|------------|-------------|--------------|
| Jordan           | 3.7         | -11.8       | 19.2        | 66           | 0.2        | -2.7       | 3.1        | 15          | 16.1        | -2.9       | 35.1        | 97           |
| Kenya            | 20.1        | 3.4         | 36.7        | 169          | 6.2        | -6.1       | 18.5       | 63          | 30.8        | 20.7       | 40.8        | 167          |
| Kyrgyzstan       | 4.9         | -4.5        | 14.3        | 98           | 6.1        | -8.2       | 20.4       | 19          | -1.2        | -6.9       | 4.5         | 47           |
| Liberia          | -16.2       | -53.1       | 20.7        | 168          | -14.8      | -46.3      | 16.6       | 33          | -14.9       | -54.4      | 24.6        | 149          |
| Malawi           | 16.8        | 7.9         | 25.7        | 199          | 19.9       | 14.5       | 25.4       | 187         | 10.4        | -6.0       | 26.9        | 245          |
| Maldives         | 9.2         | -40.9       | 59.2        | 21           | 0.0        | 0.0        | 0.0        | 4           | -0.3        | -2.2       | 1.6         | 22           |
| Mali             | 3.8         | -15.2       | 22.9        | 110          | -4.3       | -32.1      | 23.6       | 49          | 14.9        | -0.5       | 30.3        | 157          |
| Mozambique       | 9.4         | -3.0        | 21.7        | 323          | 0.9        | -6.8       | 8.7        | 92          | -10.9       | -37.2      | 15.5        | 384          |
| Myanmar          | 9.5         | -3.8        | 22.8        | 48           | 1.8        | -4.2       | 7.7        | 15          | 6.5         | -0.5       | 13.5        | 48           |
| Namibia          | 6.3         | -18.8       | 31.3        | 42           | 2.5        | -16.7      | 21.6       | 8           | -6.2        | -43.4      | 30.9        | 37           |
| Nepal            | 8.0         | -10.5       | 26.5        | 65           | 1.8        | -13.1      | 16.8       | 36          | 4.7         | -3.6       | 13.0        | 39           |
| Nigeria          | 13.2        | 8.7         | 17.6        | 204          | 11.0       | 6.0        | 16.0       | 100         | 21.3        | 9.9        | 32.7        | 385          |
| Pakistan         | 9.1         | -1.2        | 19.5        | 86           | 3.5        | -5.1       | 12.2       | 17          | 23.9        | 13.2       | 34.6        | 120          |
| Papua_New_Guinea | 44.6        | 29.8        | 59.4        | 290          | 18.4       | 1.0        | 35.9       | 143         | 46.6        | 33.3       | 60.0        | 270          |
| Peru             | 4.4         | -8.9        | 17.7        | 395          | 3.5        | 0.2        | 6.9        | 77          | 7.0         | 2.7        | 11.4        | 292          |
| Philippines      | 6.0         | -1.2        | 13.3        | 114          | -2.4       | -19.5      | 14.8       | 46          | 2.5         | -7.0       | 11.9        | 129          |
| Rwanda           | 30.5        | -2.2        | 63.1        | 49           | 16.8       | -12.1      | 45.7       | 23          | 27.6        | -9.6       | 64.8        | 46           |
| Senegal          | 7.7         | 2.3         | 13.0        | 18           | 0.3        | -9.5       | 10.2       | 8           | 10.0        | -2.7       | 22.8        | 16           |
| Sierra_Leone     | 5.1         | -15.9       | 26.1        | 263          | -0.4       | -10.2      | 9.4        | 40          | 9.8         | -18.0      | 37.7        | 262          |
| Tajikistan       | 15.1        | -0.8        | 31.1        | 128          | 2.2        | -3.6       | 8.1        | 10          | 6.0         | -7.0       | 19.0        | 88           |
| Tanzania         | 30.3        | 21.4        | 39.2        | 380          | 11.1       | 3.5        | 18.6       | 151         | 25.5        | 14.9       | 36.2        | 349          |
| Timor_Leste      | -25.9       | -60.7       | 8.8         | 137          | -7.9       | -28.7      | 12.9       | 24          | 6.6         | -0.8       | 13.9        | 36           |
| Togo             | 6.7         | -1.4        | 14.7        | 102          | -21.3      | -52.2      | 9.6        | 43          | 1.8         | -12.1      | 15.6        | 181          |
| Uganda           | 21.4        | 12.2        | 30.6        | 439          | 8.9        | -4.4       | 22.2       | 293         | 20.8        | 9.4        | 32.2        | 507          |
| Zambia           | 14.7        | 3.1         | 26.3        | 326          | 11.1       | 3.3        | 18.9       | 164         | 15.5        | 4.6        | 26.4        | 308          |
| Zimbabwe         | 4.4         | -8.9        | 17.8        | 216          | 10.6       | 1.8        | 19.3       | 101         | 16.1        | 3.2        | 29.0        | 256          |
| <b>Pooled</b>    | <b>16.9</b> | <b>13.3</b> | <b>20.5</b> | <b>11978</b> | <b>5.9</b> | <b>3.4</b> | <b>8.4</b> | <b>3831</b> | <b>10.6</b> | <b>7.7</b> | <b>13.6</b> | <b>10737</b> |

\*Prevalence difference derived from logistic regression with fractional polynomials, controlling for covariates. We calculated the average adjusted IPV prevalence for girls first married at 15 years of age and 20 years of age with margins command.

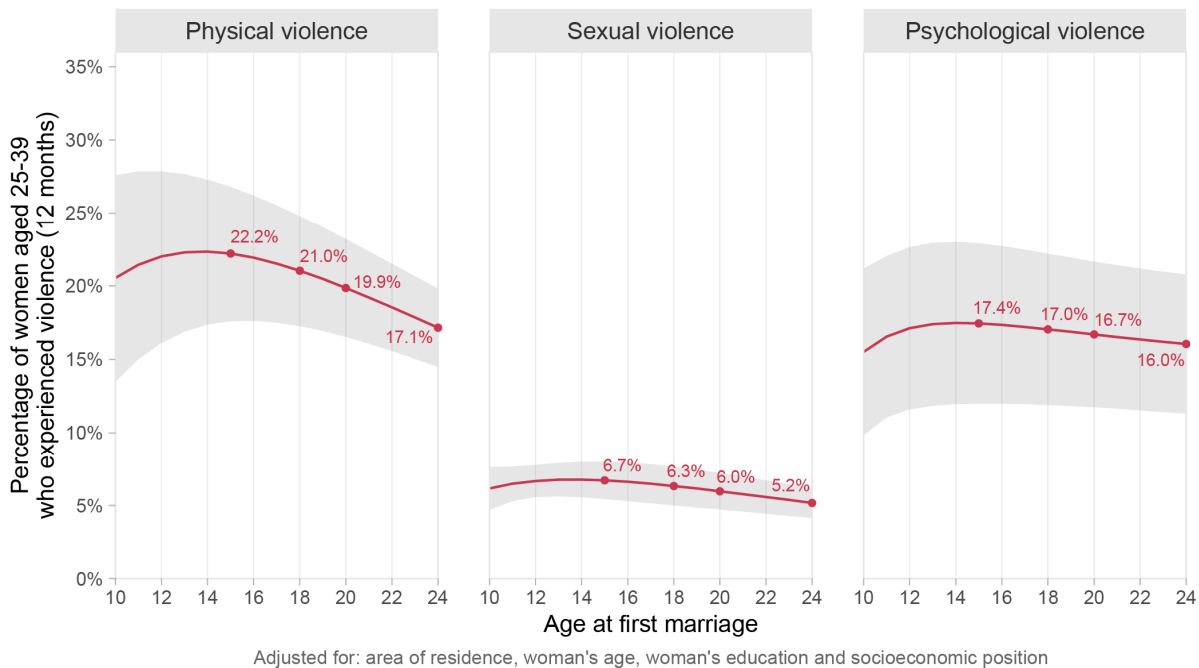

**Supplementary Figure S2.** Average adjusted IPV prevalence according to age at first marriage for women aged 25 to 39 years. Pooled results for 48 low- and middle-income countries obtained from a multilevel logistic regression model. The red line represents the continuous IPV estimate from ages 10 to 24 years at first marriage. The grey area represents the respective confidence interval. IPV estimates for the ages 15, 18, 20, and 24 years are highlighted.

### Pooled multilevel logistic regression models – women aged 25 to 39 years

We repeated the same analysis for women aged 25 to 39 years. The two powers with the best fit selected by the fp command in Stata are presented in Supplementary Table 3. For all models, 205,927 women had information available for all variables. The average number of women in each country was 4,209, ranging from 770 to 37,449. Supplementary Table 4 shows the regression coefficients for each power. Supplementary Figure 2 shows the average adjusted IPV prevalence according to age at first marriage for these models.

**Supplementary Table S4.** Selected powers for the pooled multilevel logistic regression models for women aged 25 to 39 years. Each model corresponds to one type of IPV.

| IPV type      | First power                             | Second power                                                                   |
|---------------|-----------------------------------------|--------------------------------------------------------------------------------|
| Physical      | $\ln(\text{age at first marriage})$     | $\ln(\text{age at first marriage}) \times \ln(\text{age at first marriage})$   |
| Sexual        | $(\text{age at first marriage})^{-1/2}$ | $\ln(\text{age at first marriage})$                                            |
| Psychological | $(\text{age at first marriage})^{-2}$   | $(\text{age at first marriage})^{-2} \times \ln(\text{age at first marriage})$ |

**Supplementary Table S5.** Regression coefficients for the selected powers of the pooled multilevel logistic regression models for women aged 25 to 39 years. Each model corresponds to one type of IPV.

| IPV type      | Coefficient of the<br>first power (95% CI) | Coefficient of the<br>second power (95% CI) |
|---------------|--------------------------------------------|---------------------------------------------|
| Physical      | 5.6 (3.0; 8.2)                             | -1.1 (-1.5; -0.7)                           |
| Sexual        | -29.3 (-56.7; -1.9)                        | -4.0 (-7.2; -0.7)                           |
| Psychological | -318.6 (-749.3; 112.1)                     | 148.1 (-49.4; 345.6)                        |
